# Supplementary material for: Lipid extraction from microalgae using pure caprolactam-based ionic liquids and with organic co-solvent
Source: PeerJ journal article supplement (doi:10.7717/peerj-achem.13), 2022-02-22
Supplement: Raw_data_for_fatty_acid_methyl_esters.xlsx [file Raw_data_for_fatty_acid_methyl_esters.xlsx]

## Sheet: Sheet1
FAME	Standard		CPAA		CPHA		CPTFA		CONTROL			Method	Saturated	%	Unsaturated	%
	R.T	Area	R.T	Area	R.T	Area	R.T	Area	R.T	Area		CONTROL	988172	79.0617	261703	20.9383
C4:0							4.49	1202440				CPAA	5742469	90.8448	578718	9.15521
C6:0	4.612	626475	4.602	20844	4.613	10633	4.62	56896	4.565	9503		CPHA	1816423	79.7434	461412	20.2566
C8	4.98	519303	5.152	406076	5.188	58522	5.234	214796	5.165	116176		CPTFA	4184338	89.5298	489344	10.4702
C10	5.589	345273	5.766	94643	5.273	62005
C11	6.007	182952
C12	6.505	305972	6.54	37284	6.606	6296	6.577	15342	6.492	2029		Method	C14	C16	C18	Others	Total
C13	7.08	156594	6.79	50035					7.377	20455		CONTROL	7106	808083	174150	260536	1249875
C14	7.73	282067	7.761	54097	7.866	16762	7.459	27259	7.607	7106		CPAA	112332	4727324	618324	863207	6321187
C14:1	8.336	106778	8.108	58235	8.218	17991	8.147	21458				CPHA	34753	1588500	418060	236522	2277835
C15	8.448	172834	8.24	56519	8.37	10236	8.278	11558	8.683	32204		CPTFA	48717	2596185	366891	1661889	4673682
C15:1	9.107	102287			9.164	12037	8.757	26334	8.996	18304
C16	9.296	445206	9.598	4727324	9.598	1560071	9.483	2553604	9.286	767106
C16:1	9.844	133031			9.993	28429	9.887	42581	9.816	40977		Method	C14	C16	C18	Others
C17	10.204	152333			10.367	9228						CONTROL	0.006	0.65	0.14	0.21
C17:1	10.797	132822	10.665	13011	10.793	22333	10.686	23790	10.617	9967		CPAA	0.02	0.75	0.1	0.14
C18	11.413	267306	11.325	246737	11.443	69272	11.3	82622	11.25	18834		CPHA	0.02	0.7	0.18	0.1
C18:1	11.837	390909	11.698	176793	11.978	207684	11.708	252130	11.662	72794		CPTFA	0.01	0.56	0.08	0.36
C18:2	12.358	128877
C18:2	12.718	152969	12.777	120451	12.928	120465	12.737	20141	12.663	59458
C18:3	13.473	113010			13.613	20639	13.438	5813	13.399	23064
C18:3	14.008	144722	13.926	74343			13.896	6185
C20:0	15.137	395194
C20:1			16.157	135885	16.254	31834	16.127	90912	16.107	37139
C22:0	17.396	501236
C23:0	19.192	204064
C24:0			20.51	48910	20.609	13398	20.461	19821	20.469	14759
C24:1	22.625	900303
Total		6862517		6321187		2277835		4673682		1249875
